# Supplementary material for: Low-dose interferon-alpha preconditioning and adoptive cell therapy in patients with metastatic melanoma refractory to standard (immune) therapies: a phase I/II study
Source: PubMed Central journal article supplement — J Immunother Cancer. 2020 Apr 1;8(1):e000166. doi: 10.1136/jitc-2019-000166 (PMC7174065; doi:10.1136/jitc-2019-000166), 2020-04-01
Supplement: jitc-2019-000166supp005.pdf [file jitc-2019-000166supp005.pdf]

Supplemental Figure 2, Verdegaal et al.

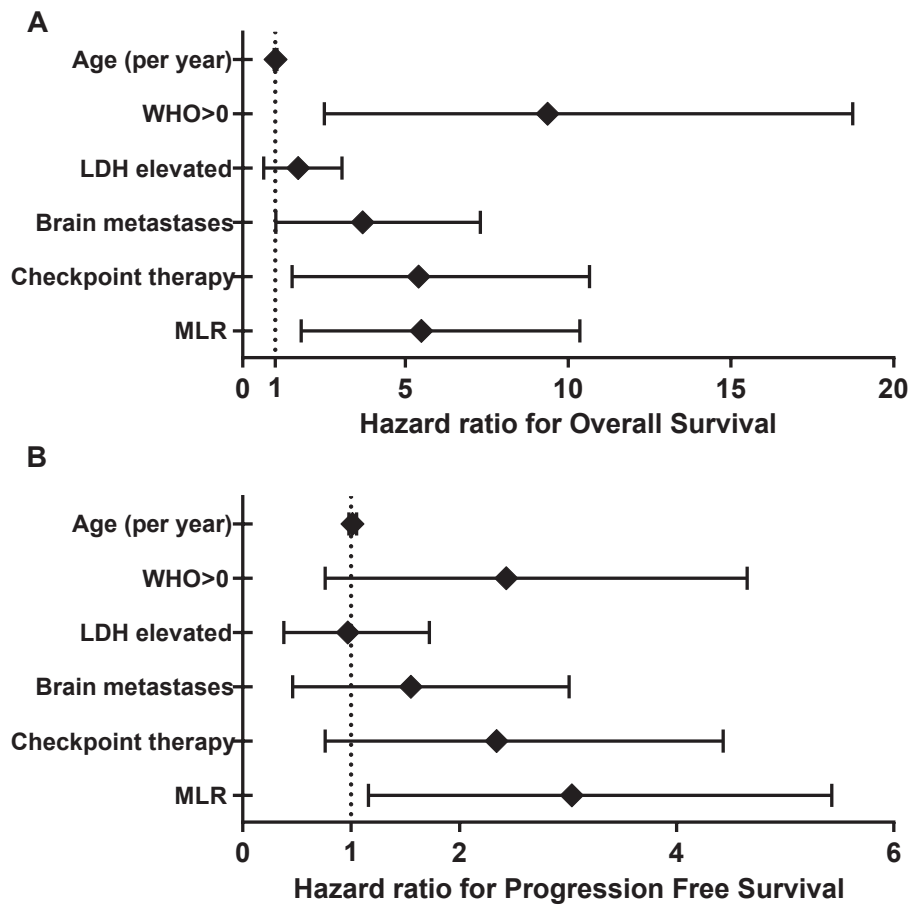

**Figure S2. Multivariate analysis of baseline characteristics.** a) Multivariate analysis showing the hazard ratio of age, WHO status, LDH level, the presence of brain metastases, prior checkpoint therapy and MLR on OS. b) Multivariate analysis showing the hazard ratio of age, WHO status, LDH level, the presence of brain metastases, prior checkpoint therapy and MLR on PFS.
