# Supplementary material for: Low-dose interferon-alpha preconditioning and adoptive cell therapy in patients with metastatic melanoma refractory to standard (immune) therapies: a phase I/II study
Source: PubMed Central journal article supplement — J Immunother Cancer. 2020 Apr 1;8(1):e000166. doi: 10.1136/jitc-2019-000166 (PMC7174065; doi:10.1136/jitc-2019-000166), 2020-04-01
Supplement: jitc-2019-000166supp009.pdf [file jitc-2019-000166supp009.pdf]

Supplemental Figure 3, Verdegaal et al.

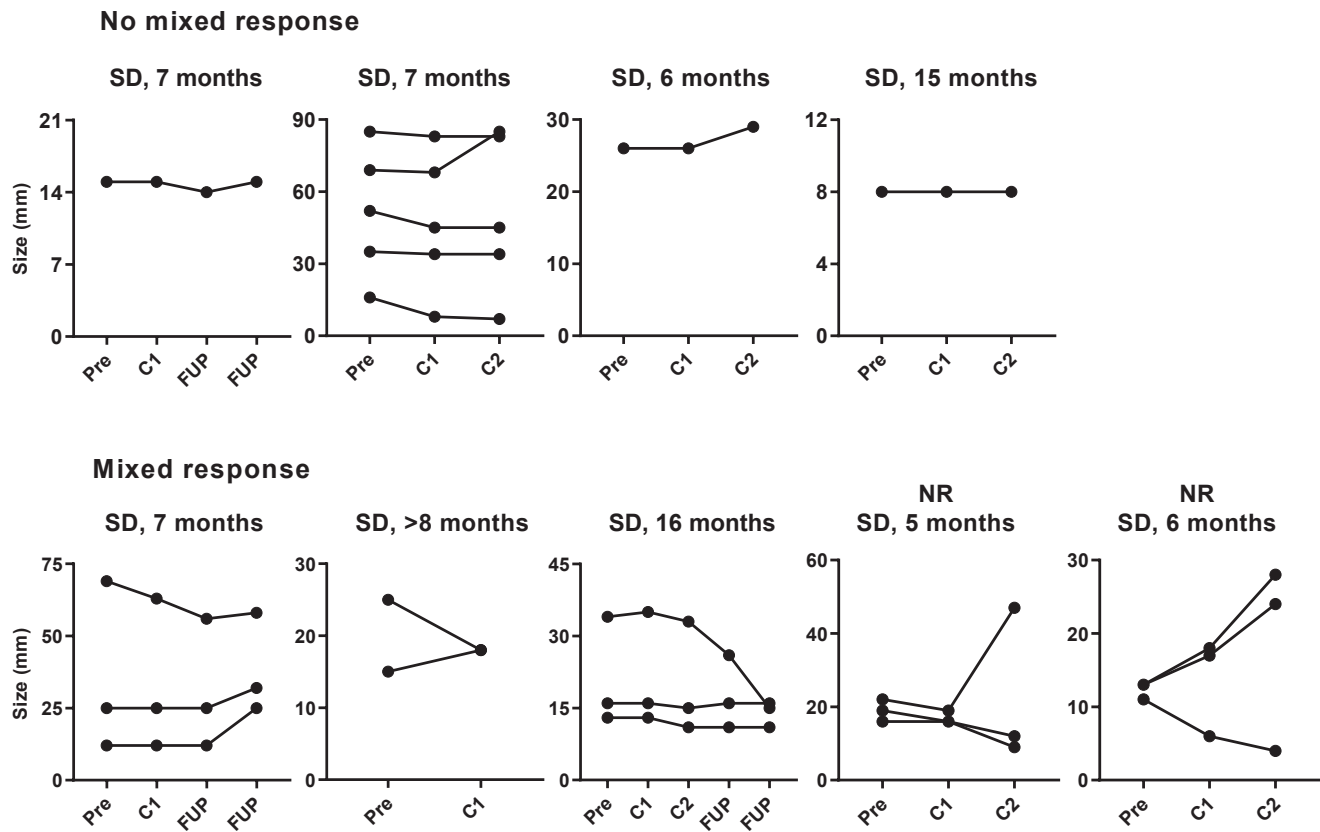

**Figure S3. Mixed responses observed in patients with initial stable disease.** The changes in target lesion(s) size in patients with stable disease is depicted for four patients without (upper panels) and five patients with mixed responses (lower panels). The size of individual target lesions before start of treatment (pre), at evaluation after treatment with one (C1) or two (C2) cycles of three T cells infusions, and at follow up (FUP), is depicted. Duration of stable disease is indicated above every graph. Two patients had initial stable disease that was not confirmed after 6 months. Therefore, these patients are non-responders (NR).
