# Supplementary material for: Low-dose interferon-alpha preconditioning and adoptive cell therapy in patients with metastatic melanoma refractory to standard (immune) therapies: a phase I/II study
Source: PubMed Central journal article supplement — J Immunother Cancer. 2020 Apr 1;8(1):e000166. doi: 10.1136/jitc-2019-000166 (PMC7174065; doi:10.1136/jitc-2019-000166), 2020-04-01
Supplement: jitc-2019-000166supp011.pdf [file jitc-2019-000166supp011.pdf]

Supplemental Figure 5, Verdegaal et al.

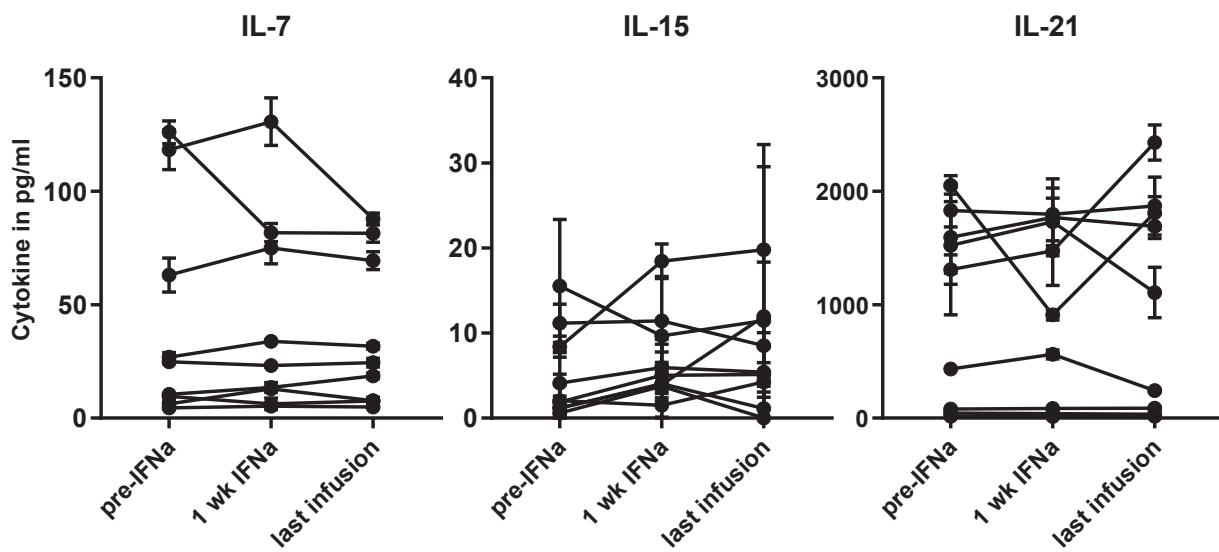

**Figure S5: Effect of IFNa on serum homeostatic cytokine levels.** The effect of IFNa conditioning on serum/plasma concentrations of IL-7, IL-15 and IL-21 was analyzed in samples obtained just prior to the start of IFNa treatment (pre-IFNa), just before the first TIL infusion (wk 1 IFNa) and after completion of three TIL infusions (last infusion) i.e. at week 7 (N=9). The circulating cytokine levels were measured by cytokine-specific ELISA assays (see methods section).
