# Supplementary material for: Low-dose interferon-alpha preconditioning and adoptive cell therapy in patients with metastatic melanoma refractory to standard (immune) therapies: a phase I/II study
Source: PubMed Central journal article supplement — J Immunother Cancer. 2020 Apr 1;8(1):e000166. doi: 10.1136/jitc-2019-000166 (PMC7174065; doi:10.1136/jitc-2019-000166), 2020-04-01
Supplement: jitc-2019-000166supp013.pdf [file jitc-2019-000166supp013.pdf]

Supplemental Figure 7, Verdegaal et al.

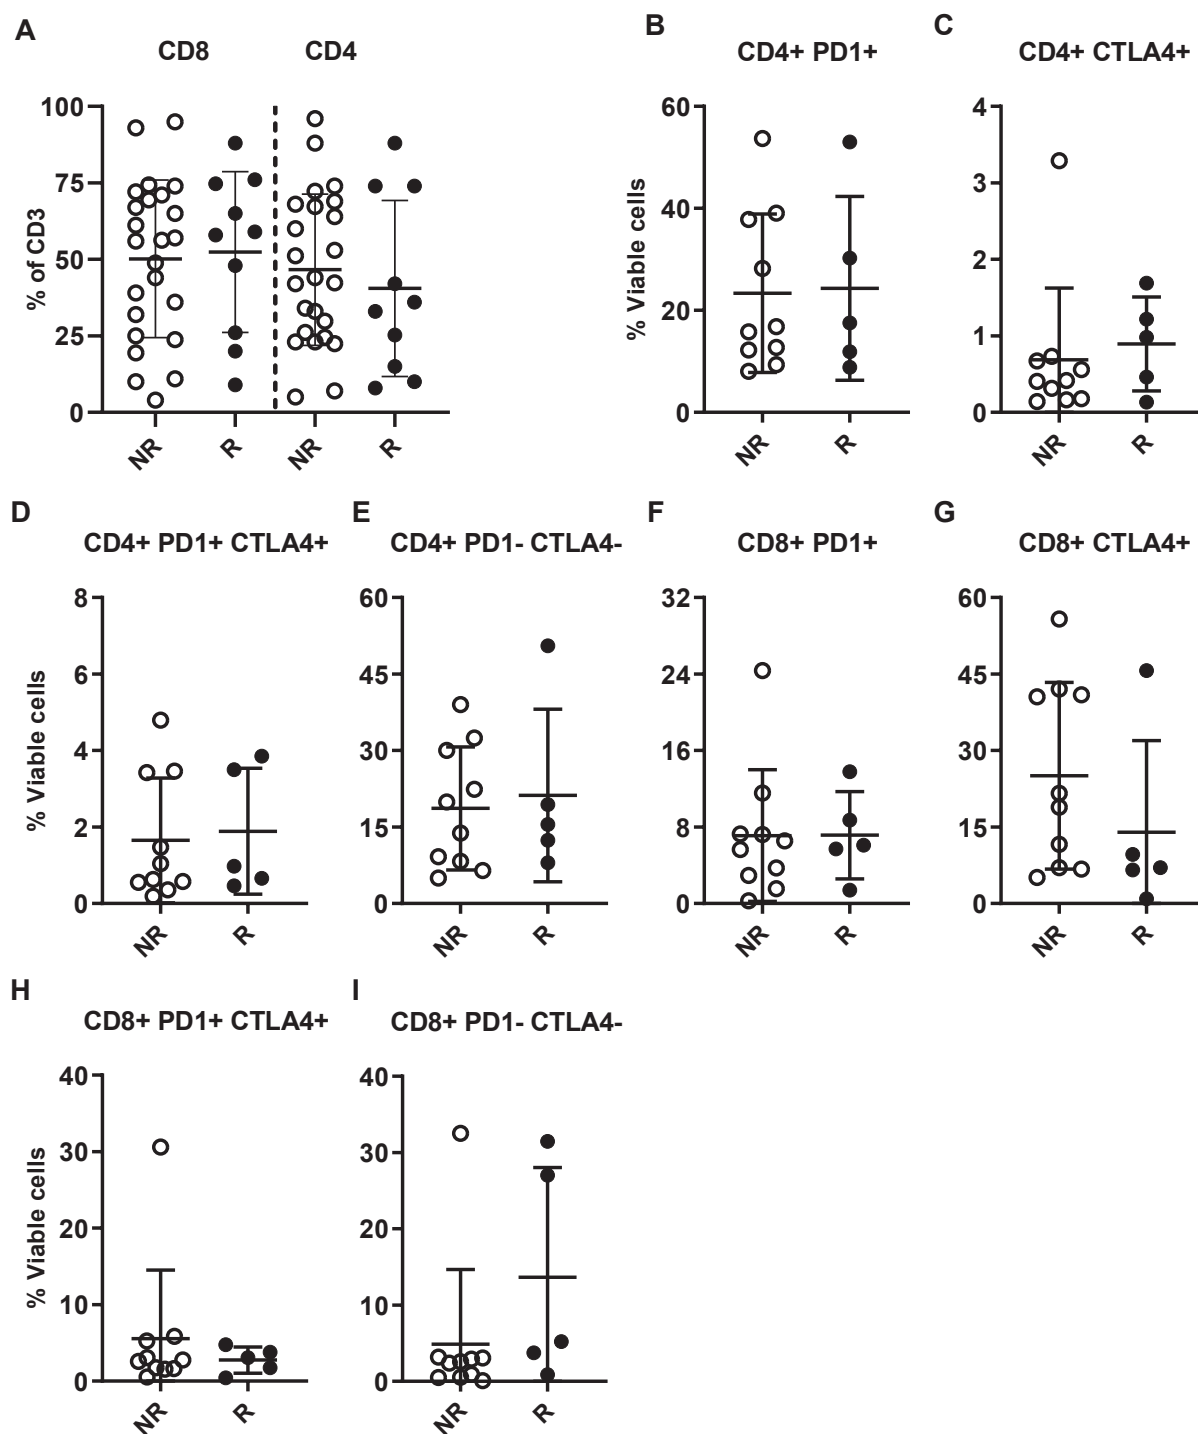

**Figure S7: Phenotypical and functional characteristics of the ACT product.** The ACT product used for treatment of responding (R, closed circles) and non-responding (NR, open circles) patients was characterized in detail for phenotypical composition by flowcytometry. **a)** The percentages of CD8+ and CD4+ cells are given as fraction of CD3+ T cells (N=34). **b-i)** The expression of checkpoint molecules/activation markers PD1 and CTLA4 was evaluated on the CD4+ and CD8+ T cell populations in the ACT product (N=15). PD1+ (**b,f**), CTLA4+ (**c,g**), PD1+CTLA4+ (**d,h**) and PD1-CTLA4- (**e,i**) CD4+ and CD8+ cells are depicted as percentage of viable cells for R (filled circles) and NR patients (open circles), respectively. Responding patients are defined as having a CR, PR or SD >6 months. Mann-Whitney analysis revealed no significant differences.
